# Supplementary material
Source: HighWire-hosted journal article supplement (http://www.qdcxjkg.com/highwire/filestream/113482/field_highwire_adjunct_files/0/MPLA.Supplemental.ERJ.pdf)
Supplement: MPLA.Supplemental.ERJ.pdf [file MPLA.Supplemental.ERJ.pdf]

### Supplemental Figure S1. Lung histological analyse

Hematoxylin and eosin-stained sections of lungs (magnification×10) from mice that underwent the (A) sham procedure (S group) or (B) 24 hours (C), 96 hours or (D) 168 hours after tracheal instillation of methicillin susceptible *Staphylococcus aureus*.

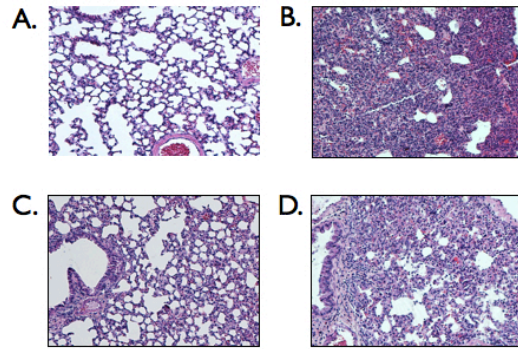

## Supplementary Figure S2

We assessed the percentage of conventional dendritic cells (cDCs) and of plasmacytoid dendritic cells (pDCs) in the DCs used for the adoptive transfer. For this experiment, splenic DCs were considered as CD3<sup>-</sup>,CD49<sup>-</sup>,CD11c<sup>+</sup> cells. Among splenic DCs, B220 was used to discriminate cDCs (CD11c<sup>+</sup>, B220<sup>-</sup>) and pDCs (CD11c<sup>+</sup>, B220<sup>+</sup>).

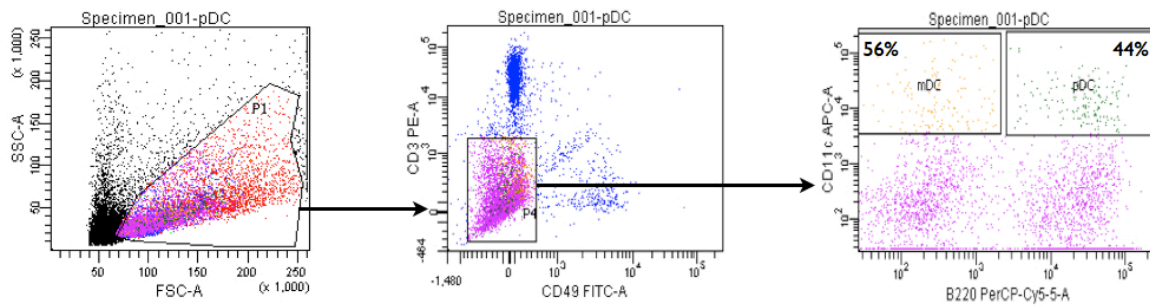

### Supplementary Figure S3. Time course of cytokines mRNA levels in dendritic cells and Natural Killer cells.

Mice were sacrificed 1, 6, 12 and 24 hours after meticillin-susceptible *Staphylococcus aureus* tracheal instillation for DCs; and 1, 6, 12, 24 and 36 hours after meticillin-susceptible *Staphylococcus aureus* tracheal instillation for NK cells. Pan DCs isolation kit (Miltenyi Biotec, Paris, France) and NK cell isolation kit II kit (Miltenyi Biotec, Paris, France) were used according to manufacturer's instructions for DCs and NK cells selection. mRNA was extracted from splenic (A) DCs or (B) NK cells and cytokines mRNA levels were assessed by reverse-transcriptase PCR quantitative. Data are representative of two independent experiments (n = 4). Boxes represent median (interquartile range). \*P < 0.05.

#### A. Dendritic cells

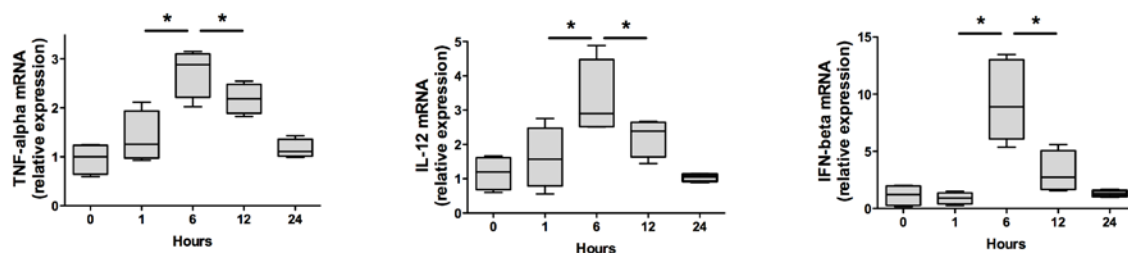

#### B. NK cells

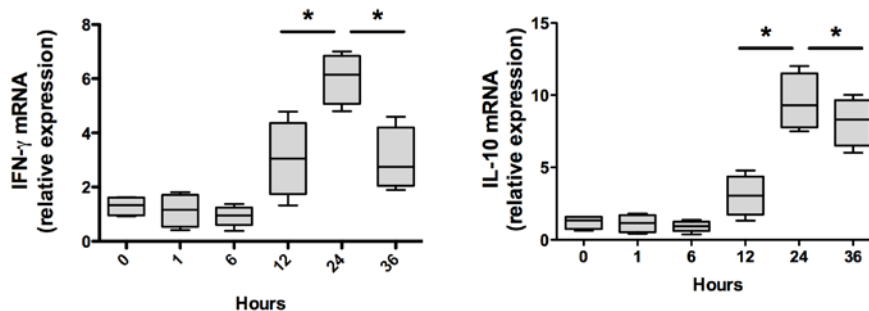

**Supplementary Table S1. Primers for real-time quantitative polymerase chain reaction (RT-qPCR)**

| <b>Primer</b> | <b>Forward primer (5'-3')</b> | <b>Reverse primer (3'-5')</b> |
|---------------|-------------------------------|-------------------------------|
| TNF- $\alpha$ | AAAGGGAGAGTGGTCAGGTTGC        | GGCTGGCTCTGTGAGGAAGG          |
| IL-12p40      | TGTGGAATGGCGTCTCTGTCTG        | CAGTTCAATGGGCAGGGTCTCC        |
| IFN- $\alpha$ | TTCTGCTC TGACCACCTCCC         | CTCCACAGGATCACTGTGTACCT       |
| IFN- $\gamma$ | CATCGGCTGACCTAGAGAAGAC        | GCAGTGTGTAGCGTTCATTGTC        |
| GAPDH         | ACCACAGTCCATGCCATCAC          | ACCTTGCCCACAGCCTTG            |
